# Supplementary material for: Highly Sensitive and Wide-Range Detection of Thiabendazole via Surface-Enhanced Raman Scattering Using Bimetallic Nanoparticle-Functionalized Nanopillars
Source: MDPI journal article supplement (doi:10.3390/bios14030133), 2024-03-04
Supplement: s1 [file s1]

Supplementary Materials

# Highly Sensitive and Wide-Range Detection of Thiabendazole via Surface-Enhanced Raman Scattering Using Bimetallic Nanoparticle-Functionalized Nanopillars

Hyunjun Park <sup>†</sup>, Gayoung Kim <sup>†</sup>, Woochang Kim <sup>†</sup>, Eugene Park, Joohyung Park <sup>\*</sup> and Jinsung Park <sup>\*</sup>

Department of Biomechatronic Engineering, College of Biotechnology and Bioengineering, Sungkyunkwan University, Suwon 16419, Republic of Korea; guswns1105@g.skku.edu (H.P.); kgy9173@g.skku.edu (G.K.); wkim91@skku.edu (W.K.); delorean12@g.skku.edu (E.P.)

<sup>\*</sup> Correspondence: parkjoodori@skku.edu (J.P.) and nanojspark@skku.edu (J.P.)

<sup>†</sup> These authors contributed equally to this work.

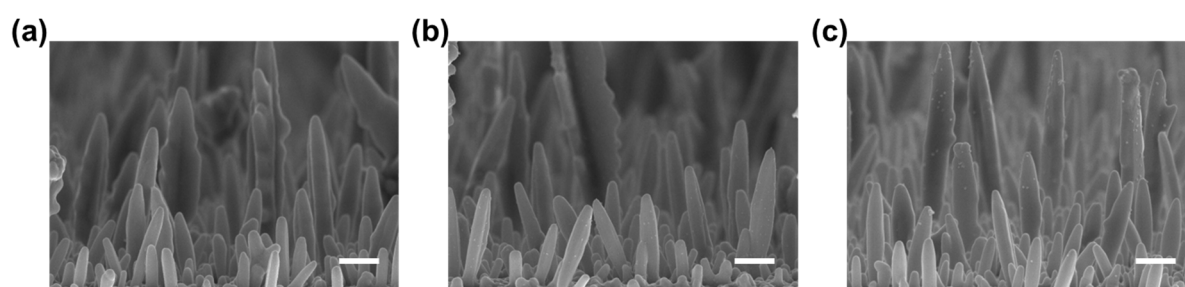

**Figure S1.** SEM image for examining overall morphology of a) SNPi, b) GNP@SNPi, and c) BNP@SNPi (Scale bar: 1 μm).

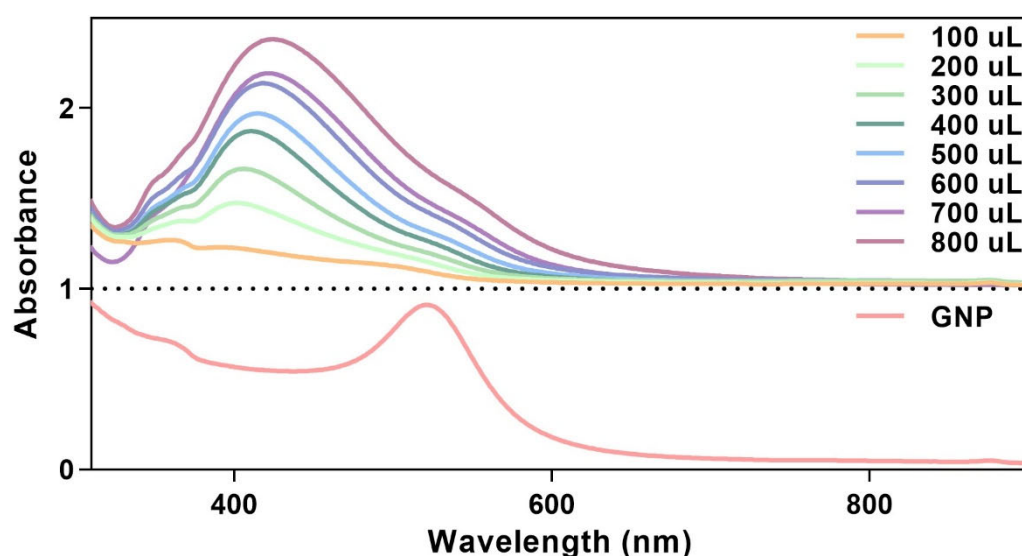

**Figure S2.** UV-vis spectrum of BNP synthesized with GNP and varying volumes of AgNO<sub>3</sub>.

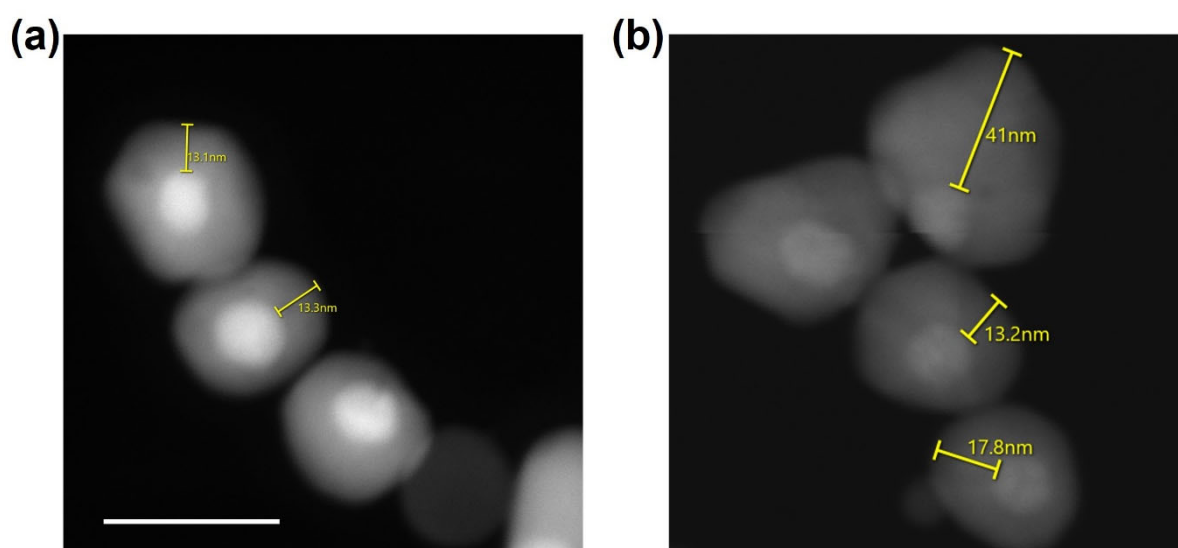

Figure S3. TEM image of BNP for a) 600  $\mu\text{L}$  and b) 800  $\mu\text{L}$  of  $\text{AgNO}_3$  (Scale bar: 50 nm).

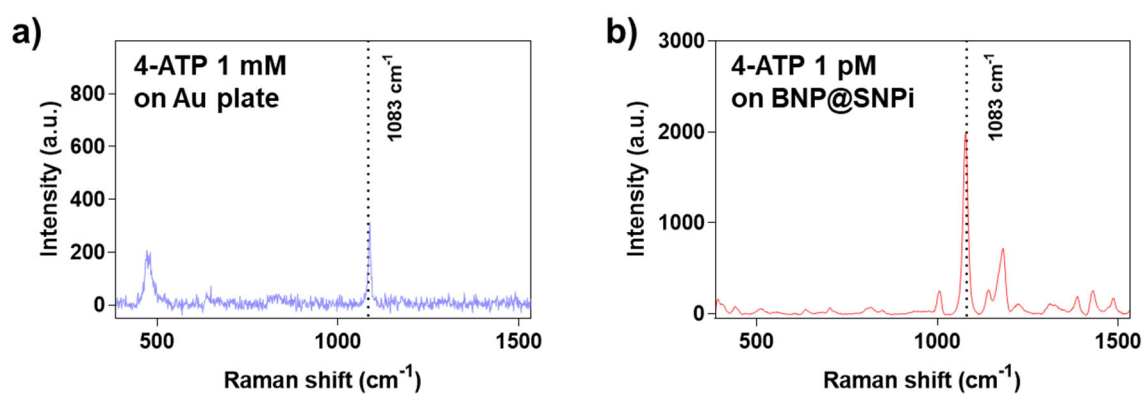

Figure S4. Raman spectrum of a) 1 mM of 4-ATP on bare Au plate and b) 1 pM of 4-ATP on BNP@SNPi substrate.

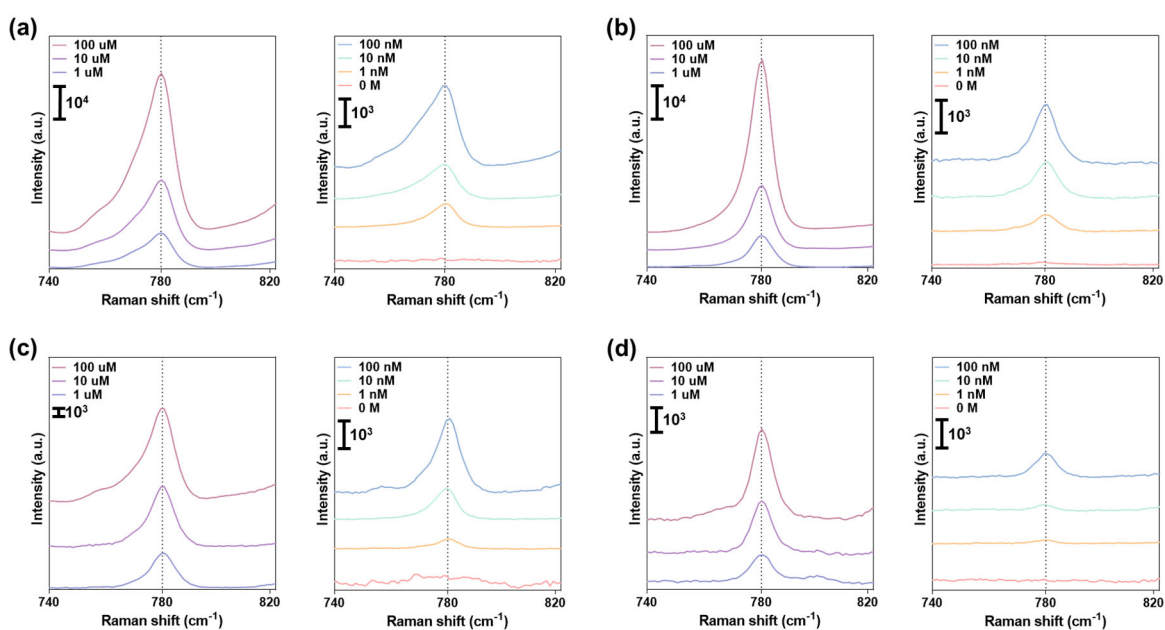

**Figure S5.** Raman spectral data for TBZ concentration in a) tap water, b) drinking water, c) orange juice, and d) human serum.

**Table S1.** Comparison of the SERS sensing performance of the BNP@SNPi substrate and other sensing platforms for TBZ.

| SERS substrate   | Detection range        | Detection Limit | References       |
|------------------|------------------------|-----------------|------------------|
| HAu/Ag nanostar  | 497 $\mu$ M – 4.97 nM  | 4.97 nM         | [1]              |
| MOF              | 9.94 $\mu$ M – 124 nM  | 124 nM          | [2]              |
| Au/Ag nanopillar | 10 $\mu$ M – 100 pM    | 100 pM          | [3]              |
| AuNR             | 4.97 $\mu$ M – 497 nM  | 497 nM          | [4]              |
| HSM@AuNP         | 497 $\mu$ M – 24.85 nM | 24.85 nM        | [5]              |
| AgNF             | 14.91 – 1.49 mM        | 1.49 mM         | [6]              |
| AgNP paper       | 497 $\mu$ M – 497 nM   | 497 nM          | [7]              |
| AgNW-tape        | 4.97 mM – 49.7 nM      | 49.7 nM         | [8]              |
| BNP@SNPi         | 1 mM – 100 pM          | 1.06 pM         | <b>This work</b> |

## References

- Hassan, M.M.; Xu, Y.; He, P.; Zareef, M.; Li, H.; Chen, Q. Simultaneous Determination of Benzimidazole Fungicides in Food Using Signal Optimized Label-Free HAu/Ag NS-SERS Sensor. *Food Chem* **2022**, *397*, 133755, doi:10.1016/J.FOOD-CHEM.2022.133755.
- Sun, Y.; Yu, X.; Hu, J.; Zhuang, X.; Wang, J.; Qiu, H.; Ren, H.; Zhang, S.; Zhang, Y.; Hu, Y. Constructing a Highly Sensitivity SERS Sensor Based on a Magnetic Metal-Organic Framework (MOF) to Detect the Trace of Thiabendazole in Fruit Juice. *ACS Sustain Chem Eng* **2022**, *10*, 8400–8410, doi:10.1021/ACSSUSCHEMENG.2C01377/ASSET/IMAGES/LARGE/SC2C01377\_0007.JPEG.
- Ansah, I.B.; Lee, S.H.; Mun, C.W.; Yang, J.Y.; Park, J.; Nam, S.Y.; Lee, S.; Kim, D.H.; Park, S.G. Nanoscale Crack Generation of Au/Ag Nanopillars by in Situ Galvanic Replacement for Sensitive, Label-Free, and Rapid SERS Detection of Toxic Substances. *Sens Actuators B Chem* **2023**, *379*, 133172, doi:10.1016/J.SNB.2022.133172.
- Pan, H.; Ahmad, W.; Jiao, T.; Zhu, A.; Ouyang, Q.; Chen, Q. Label-Free Au NRs-Based SERS Coupled with Chemometrics for Rapid Quantitative Detection of Thiabendazole Residues in Citrus. *Food Chem* **2022**, *375*, 131681, doi:10.1016/J.FOOD-CHEM.2021.131681.
- Qu, Q.; Zeng, C.; Peng, X.; Qi, W.; Wang, M. Sensitive SERS Detection of Pesticide Residues in Beverages Based on an Extraction Integrated Plasmonic Platform. *Sens Actuators B Chem* **2023**, *376*, 133042, doi:10.1016/J.SNB.2022.133042.
- Li, H.; Luo, X.; Haruna, S.A.; Zhou, W.; Chen, Q. Rapid Detection of Thiabendazole in Food Using SERS Coupled with Flower-like AgNPs and PSL-Based Variable Selection Algorithms. *Journal of Food Composition and Analysis* **2023**, *115*, 105016, doi:10.1016/J.JFCA.2022.105016.
- He, Z.H.; Zhu, W.W.; Jiang, Y.L.; Zhao, S.S.; Yan, J.; Tan, X.C. Green Synthesis of Paper-Based SERS Substrate for the Quantitative Detection of Thiabendazole by Wipe Sampling. *Microchemical Journal* **2024**, *197*, 109729, doi:10.1016/J.MICROC.2023.109729.
- Dai, X.; Xue, D.; Liu, X.; Gu, C.; Jiang, T. An Adhesive SERS Substrate Based on a Stretched Silver Nanowire-Tape for the in Situ Multicomponent Analysis of Pesticide Residues. *Analytical Methods* **2023**, *15*, 1261–1273, doi:10.1039/D3AY00022B.
